# Supplementary material for: Linear ubiquitination induces NEMO phase separation to activate NF-κB signaling
Source: PubMed Central journal article supplement (PMC9889916; doi:10.26508/lsa.202201607), 2023-01-31

1D

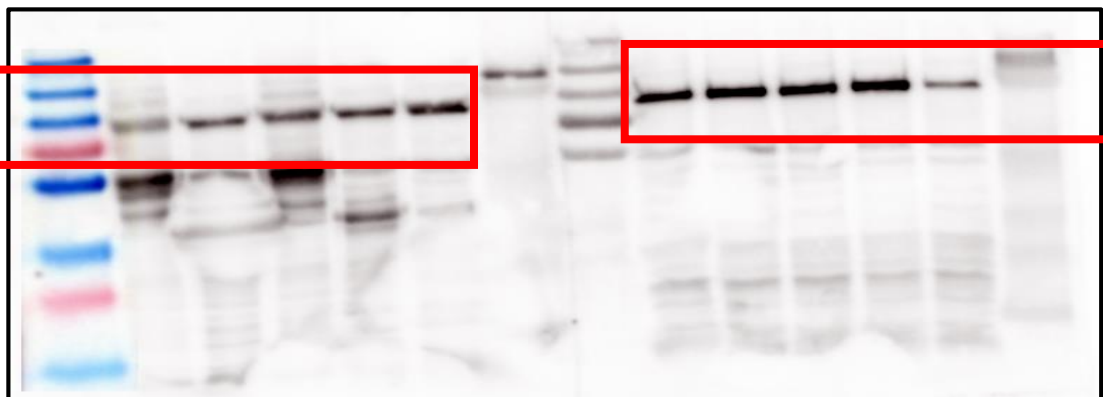

IKK $\beta$   
input

IKK $\beta$   
IP

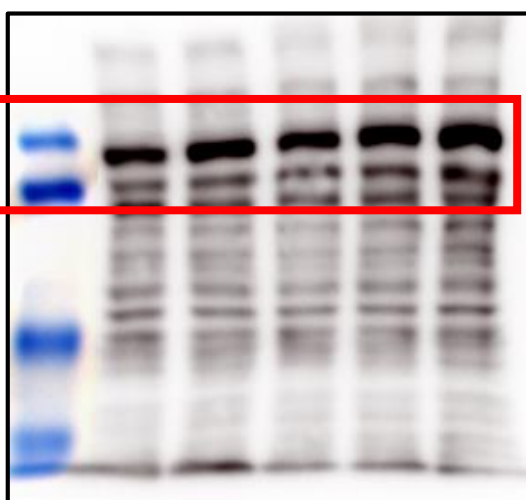

HOIP  
Input

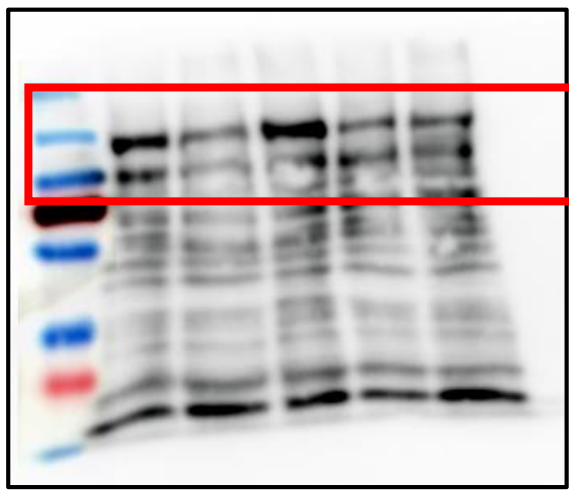

HOIP  
IP

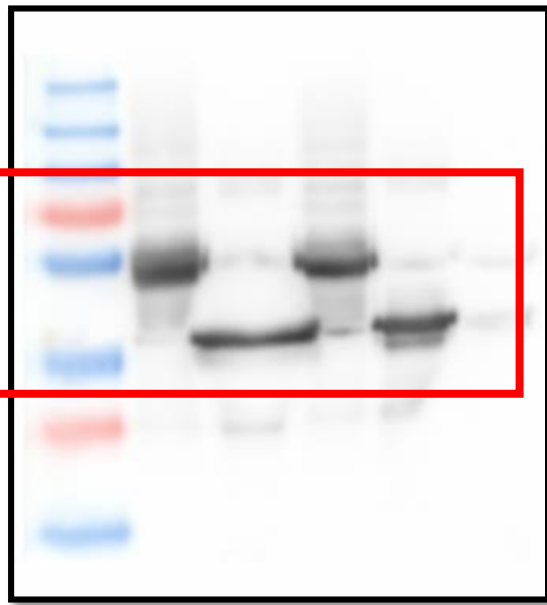

NEMO  
Input

WT  
Q330X

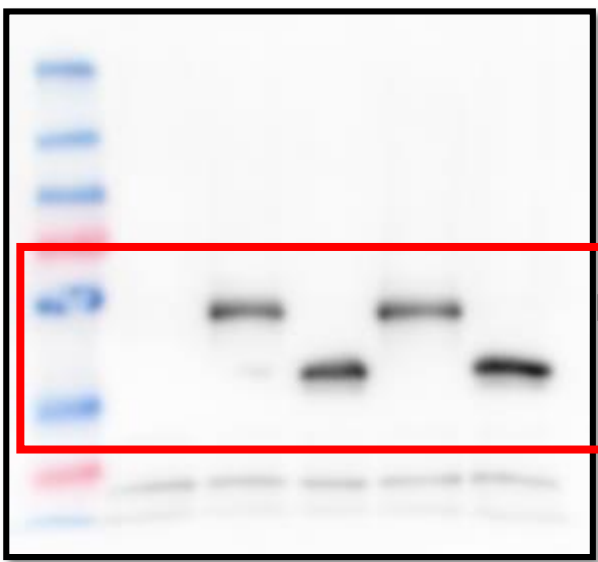

NEMO  
(HA)  
IP

**1D**

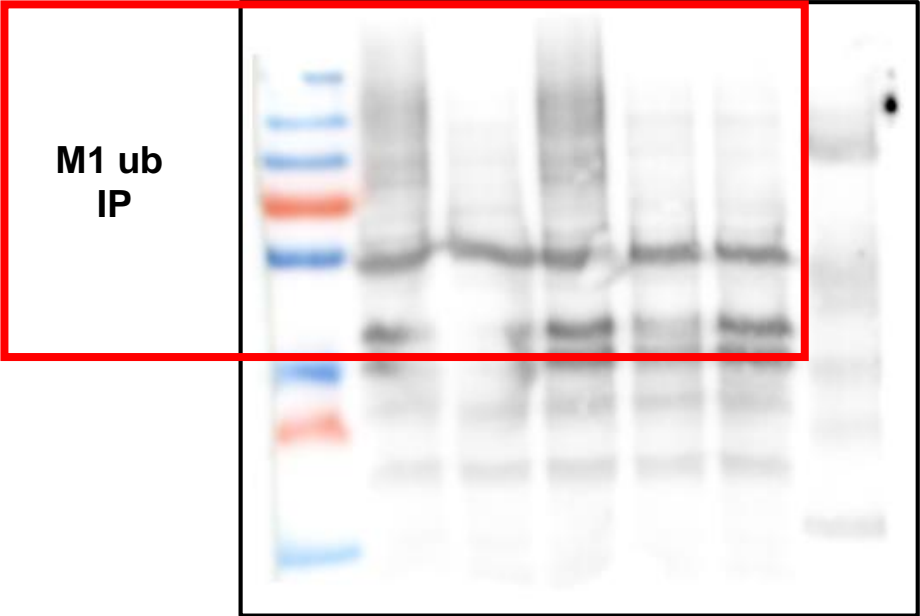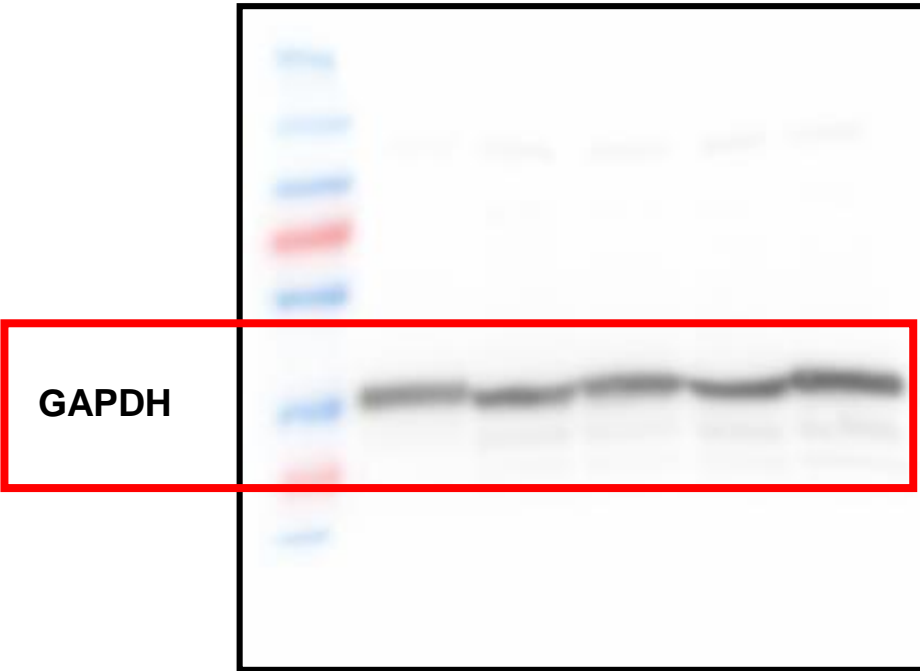

**1C**

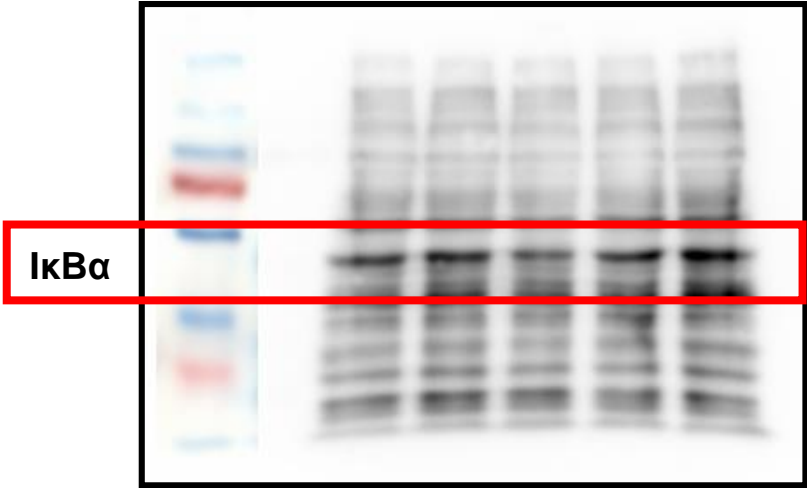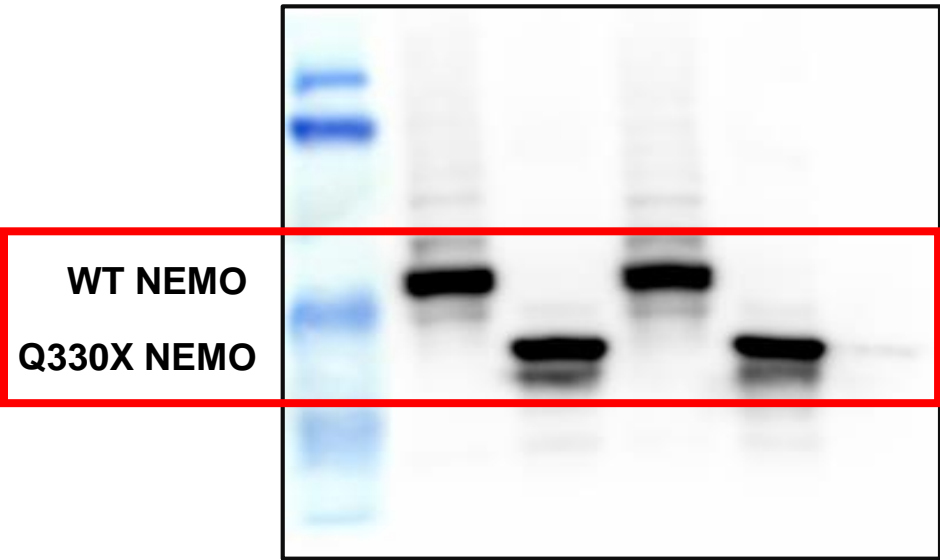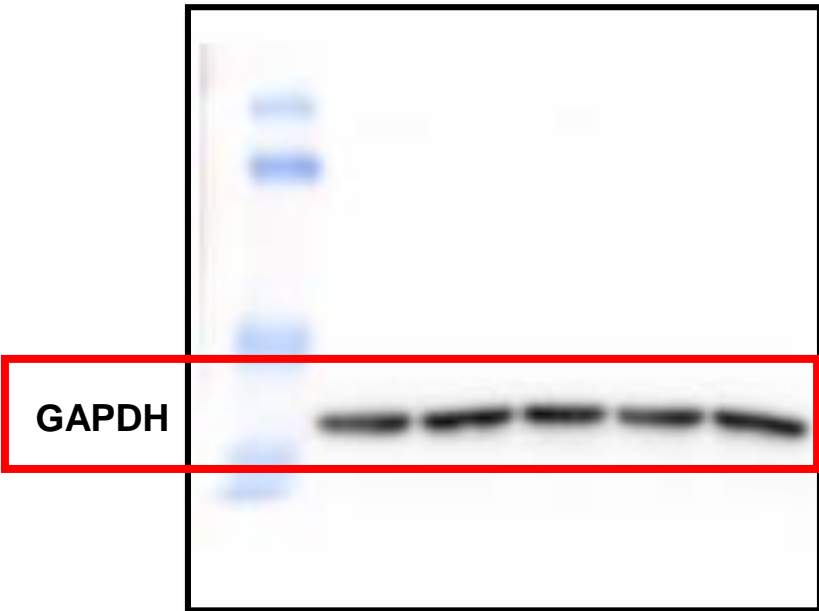

Supplement: LSA-2022-01607_SdataF1.2.pdf [file LSA-2022-01607_SdataF1.2.pdf]
