# Supplementary material for: Linear ubiquitination induces NEMO phase separation to activate NF-κB signaling
Source: PubMed Central journal article supplement (PMC9889916; doi:10.26508/lsa.202201607), 2023-01-31

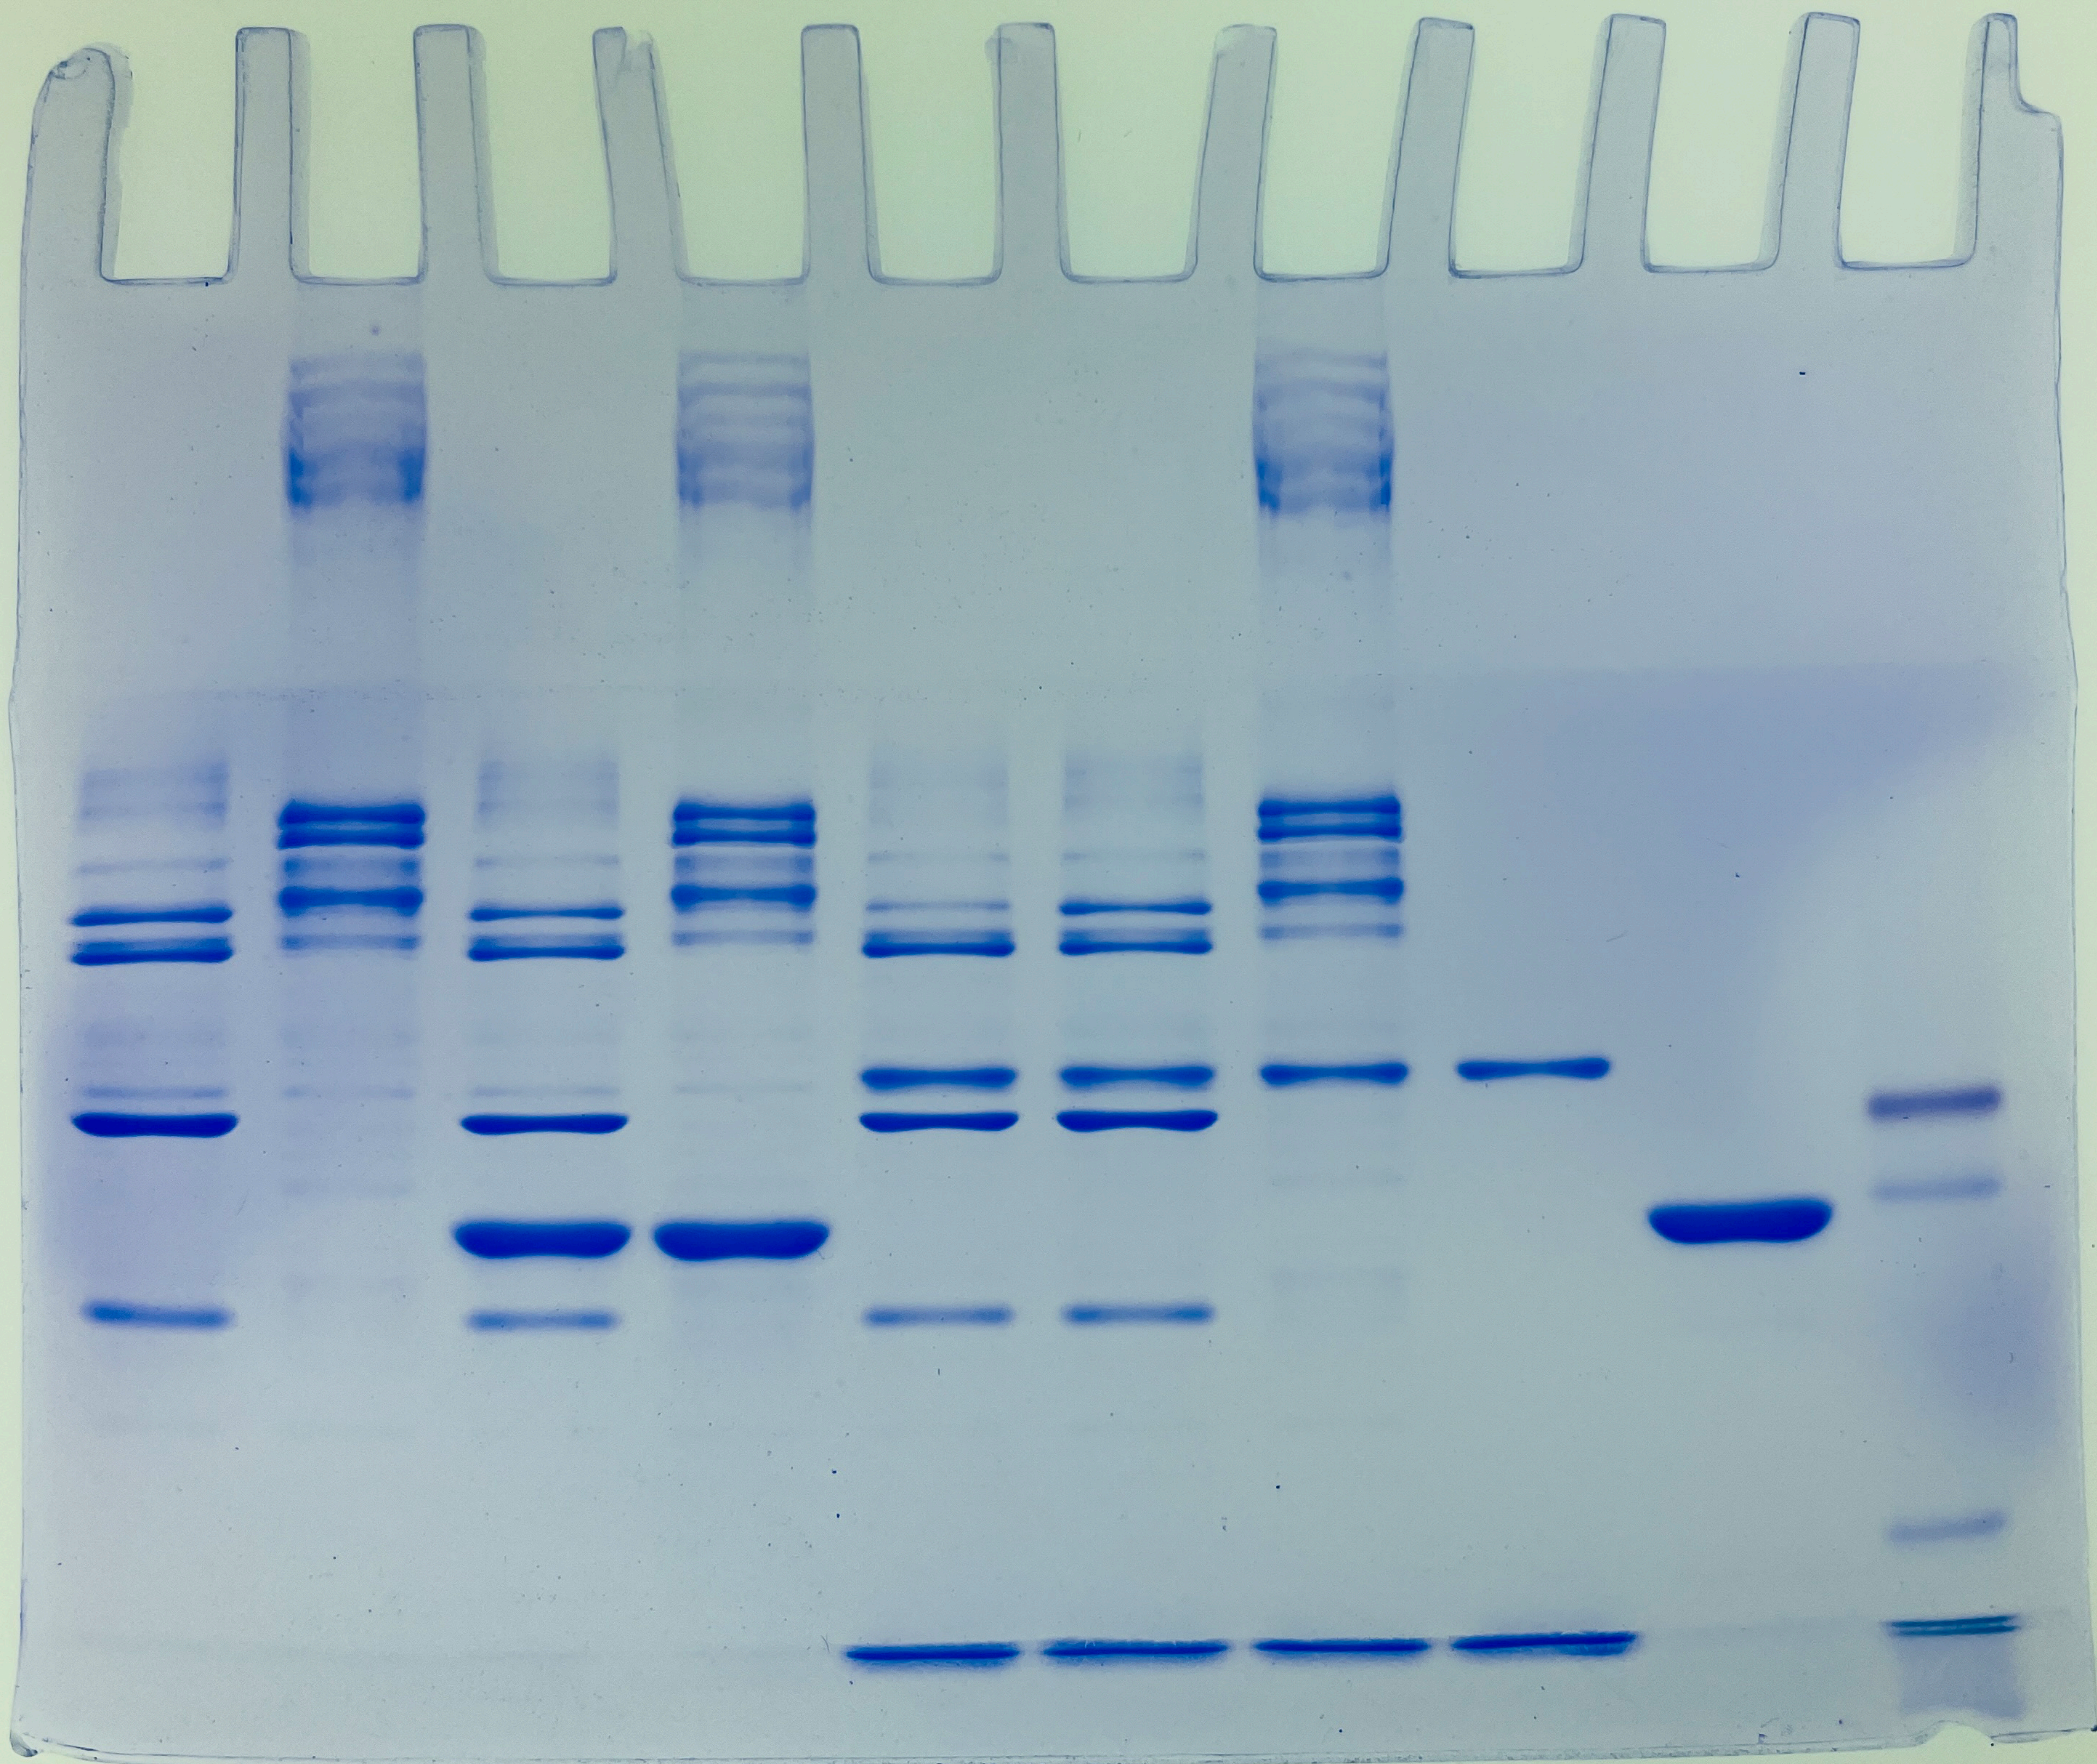

Supplement: LSA-2022-01607_SdataF4.pdf [file LSA-2022-01607_SdataF4.pdf]
