# Supplementary material for: Linear ubiquitination induces NEMO phase separation to activate NF-κB signaling
Source: Life Sci Alliance. 2023 Jan 31;6(4):e202201607. doi: 10.26508/lsa.202201607 (PMC9889916; doi:10.26508/lsa.202201607)
Supplement: Supplementary file 1 [file LSA-2022-01607_SdataF1.1.xlsx]

## Sheet: 1B
Figure 1B				WT NEMO vs Q330X NEMO p65 translocation
				1,2, 3 represents biological replicates
				n=3
	Untreated
WT NEMO	p65 translocated	total cells counted	Percentage
1	2	65	3.07692
2	4	70	5.71429
3	1	65	1.53846
Total/ Average		200	3.44322
	IL-1 treated
WT NEMO	p65 translocated	total cells counted	Percentage
1	44	66	66.6667
2	63	76	82.8947
3	49	58	84.4828
Total/ Average		200	78.0147
	Untreated
Q330X NEMO	p65 translocated	total cells counted	Percentage
1	6	65	9.23077
2	2	55	3.63636
3	4	80	5
Total/ Average		200	5.95571
	IL-1 treated
Q330X NEMO	p65 translocated	total cells counted	Percentage
1	7	53	13.2075
2	13	72	18.0556
3	5	75	6.66667
Total/ Average		200	12.6433
